# Supplementary material for: Amplicon-based skin microbiome profiles collected by tape stripping with different adhesive film dressings: a comparative study
Source: PubMed Central journal article supplement (PMC7891171; doi:10.1186/s12866-021-02122-4), 2021-02-18
Supplement: 12866_2021_2122_MOESM1_ESM.pdf [file 12866_2021_2122_MOESM1_ESM.pdf]

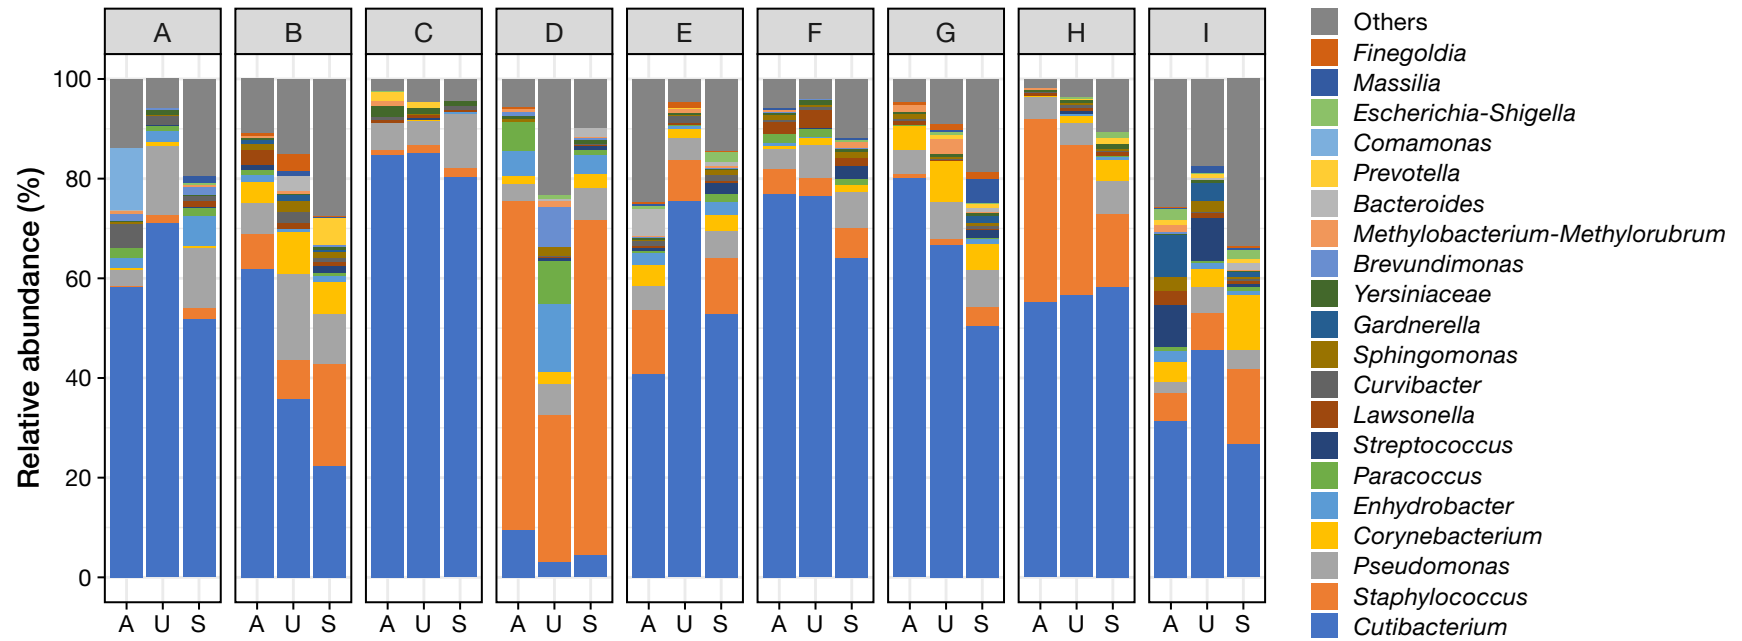

**Figure S1. Relative abundance of the top 20 genera of skin microbiota for each participant.**

A, acrylic adhesive; U, urethane adhesive; S, silicone adhesive.
