# Supplementary material for: Amplicon-based skin microbiome profiles collected by tape stripping with different adhesive film dressings: a comparative study
Source: PubMed Central journal article supplement (PMC7891171; doi:10.1186/s12866-021-02122-4), 2021-02-18
Supplement: 12866_2021_2122_MOESM3_ESM.pdf [file 12866_2021_2122_MOESM3_ESM.pdf]

**Table S2.** Cycle numbers in the first PCR.

| <b>Sample ID</b> | <b>Acrylic</b> | <b>Urethane</b> | <b>Silicone</b> |
|------------------|----------------|-----------------|-----------------|
| A                | 30             | 31              | 32              |
| B                | 30             | 33              | 34              |
| C                | 30             | 30              | 30              |
| D                | 30             | 31              | 33              |
| E                | 30             | 30              | 32              |
| F                | 30             | 30              | 30              |
| G                | 30             | 30              | 32              |
| H                | 30             | 30              | 30              |
| I                | 30             | 30              | 31              |
