# Supplementary material for: Amplicon-based skin microbiome profiles collected by tape stripping with different adhesive film dressings: a comparative study
Source: PubMed Central journal article supplement (PMC7891171; doi:10.1186/s12866-021-02122-4), 2021-02-18
Supplement: 12866_2021_2122_MOESM5_ESM.pdf [file 12866_2021_2122_MOESM5_ESM.pdf]

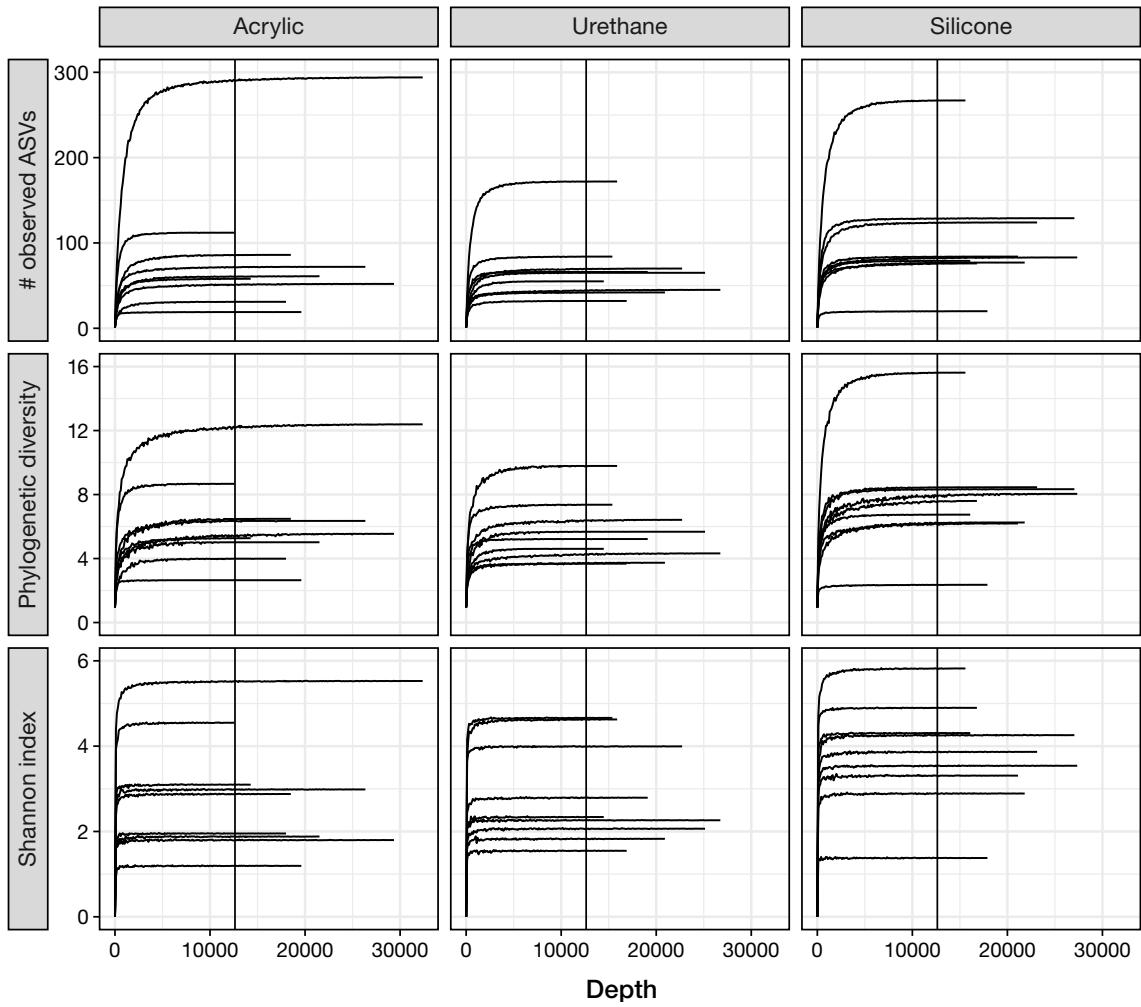

**Figure S3. Rarefaction curves for each alpha diversity index.**

ASV, amplicon sequence variants. Vertical bars denote 12627 reads, the minimum read number among all the samples.
